# Supplementary material
Source: PubMed Central journal article supplement (PMC2604803)

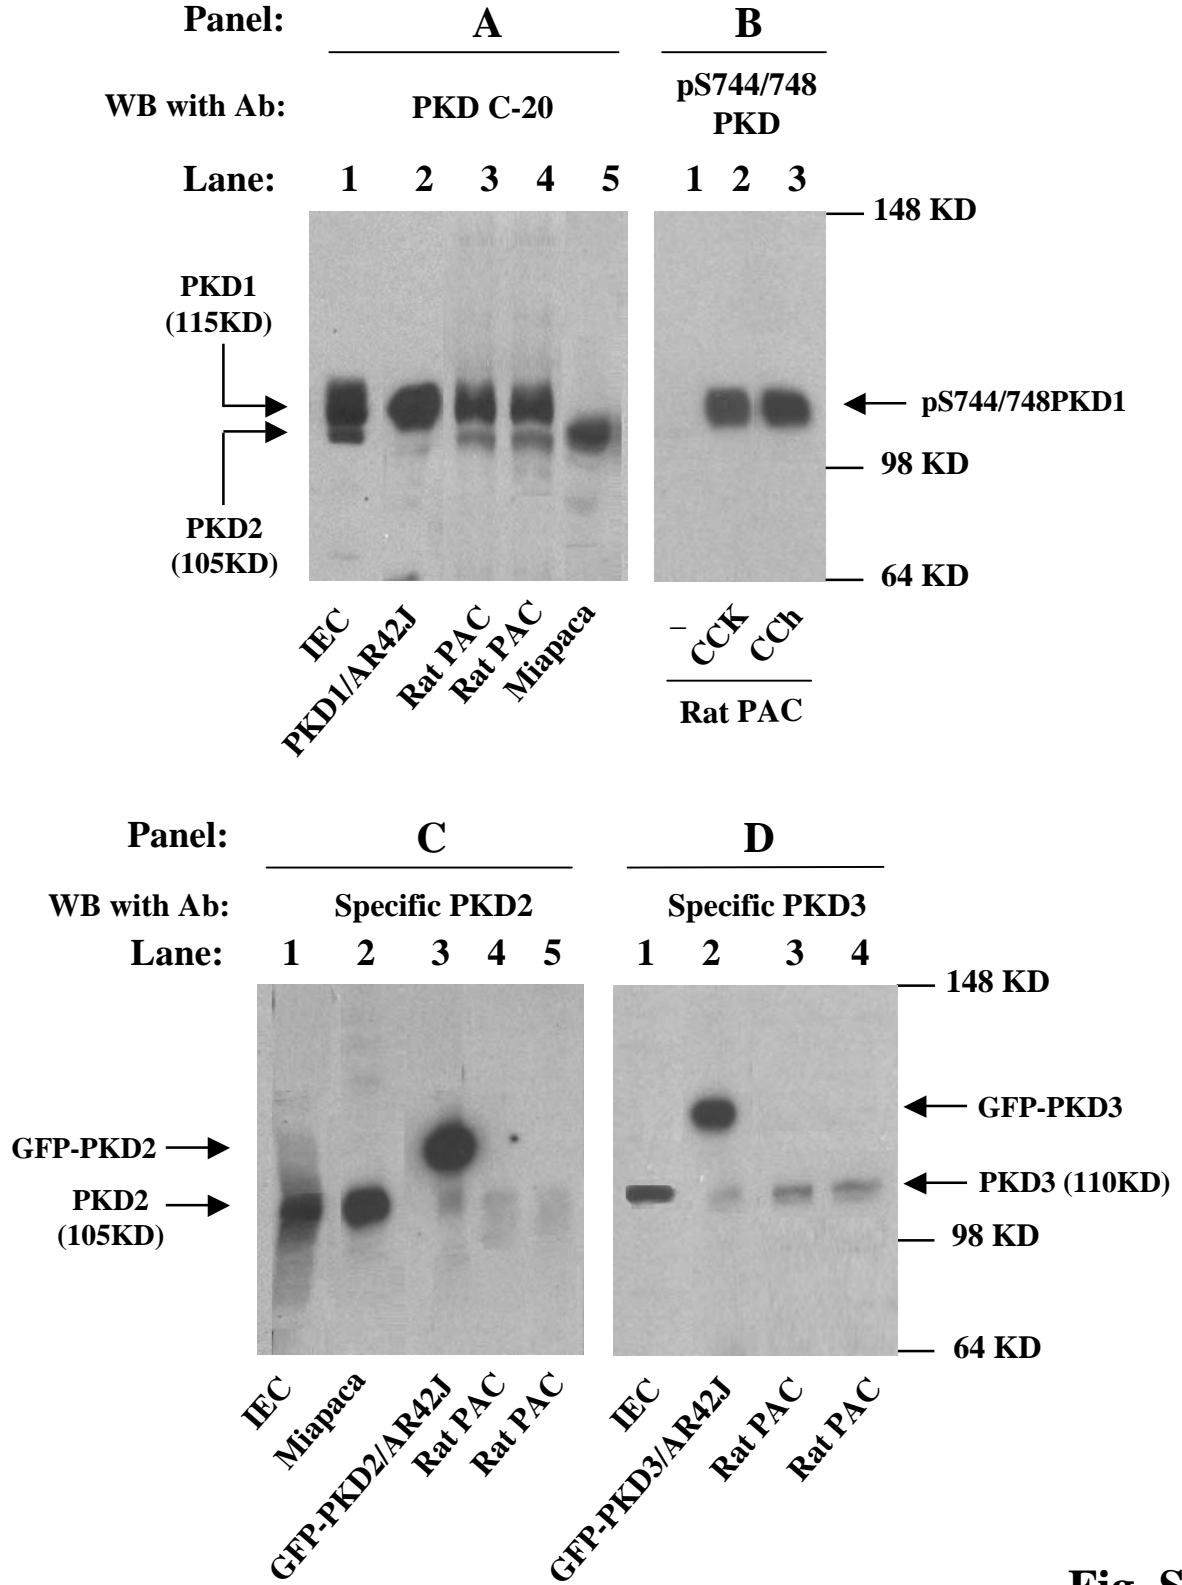

**Fig. S1**

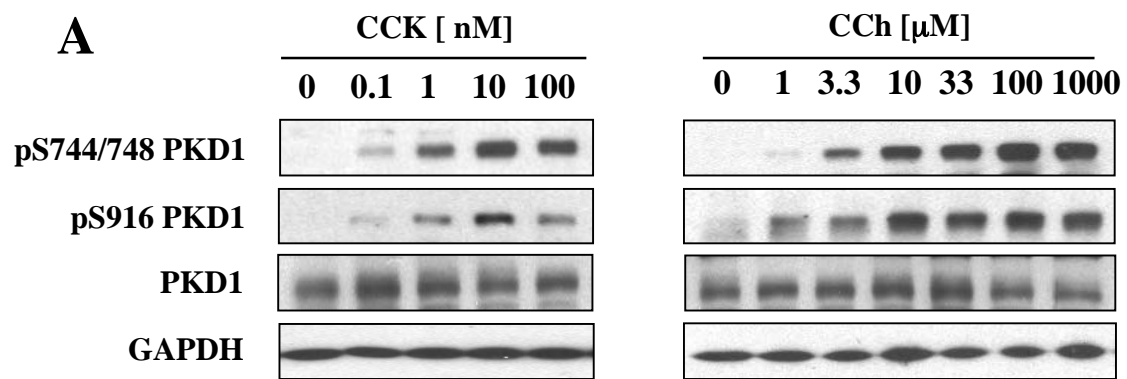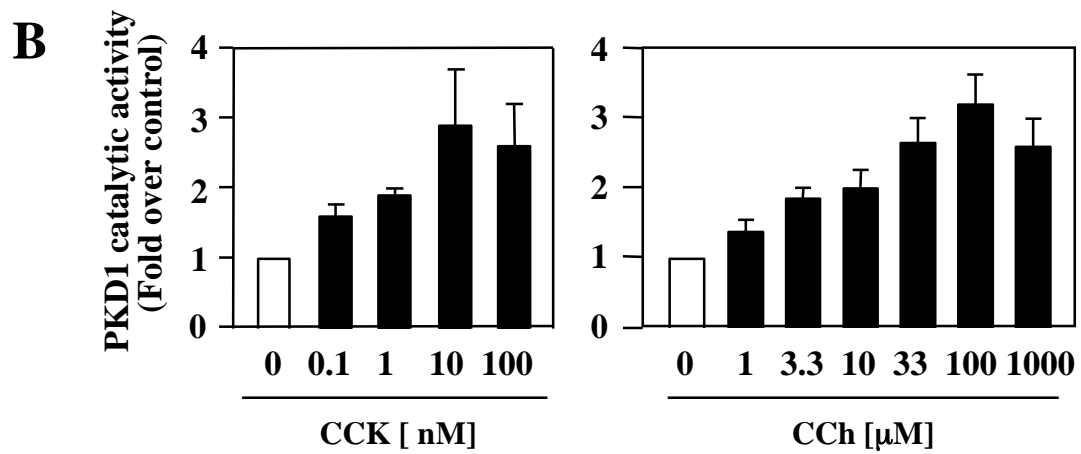

**Fig. S2**

Supplement: 90452.2008_1.pdf [file 90452.2008_1.pdf]
